# Supplementary material for: Clock gene signature predicts Insomnia and links to sleep/circadian parameters
Source: Research Square preprint supplement (doi:10.21203/rs.3.rs-6268489/v1), 2025-06-25
Supplement: Supplementary file 1 [file 8cdd4c47f86ed8048f93639a.docx]

**Supplemental material for *“Clock gene signature predicts Insomnia and links to sleep/circadian parameters”* in Molecular Psychiatry**

**Supplementary Figures**

**Supplementary Figure S1 – Chronic Insomnia promotes increased rest:activity patterns but does not affect actigraphy-derived non-parametric and parametric circadian rhythm measures.** Group-averaged 24-hour profiles over 14 days of actigraphy data illustrating differences in (A) time-above-threshold (TAT), and (B) Zero Crossing Method (ZCM). Graphs are plotted as mean ± SEM. Mean values were calculated for each minute based on the raw data. N = 6-14 per group.Graphs show the Mean ± SEM for the following variables: (C) participant’s most active 10 h (M10), (D) least active 5 h (L5), (E) relative amplitude (RA), (F) intradaily variability (IV), (G) intradaily stability (IS), (H) circadian function index (CFI), (I) Midline Estimating Statistic of Rhythm (MESOR), and (J) amplitude of chronic insomnia patients and its subgroups,insomnia with short sleep duration (ISSD) and insomnia with normal sleep duration (INSD). Significant alterations were evaluated using unpaired parametric t-test for comparisons with control group (*p < 0.05, **p < 0.01). N = 6-14 per group.

**Supplementary Figure S2 – The temporal expression of core-clock genes in peripheral blood mononuclear cells (PBMCs) is affected in insomnia patients with short sleep duration (ISSD) compared to control subjects.** Clock genes expression oscillations (BMAL1, CLOCK, PER1-3, CRY1-2, REV-ERBα, REV-ERBβ) along day (8:00, 11:00, 15:30 and 21:30 h) in PBMCs of chronic insomnia patients and subtypes, relative to control subjects (grey line). (A) patients with chronic insomnia; (B) insomnia patients with short sleep duration (ISSD); (C) insomnia patients with normal sleep duration (INSD). Results are presented using harmonic regression for the data collected at 8:00, 11:00, 15:30 and 21:30 h, following the summarization of each participant data using the mean ΔΔCT values ± SEM.

**Supplementary Tables**

Supplementary Table S1. Primer sequences used for gene expression analysis and optimal conditions for qRT-PCR.

| Gene | Primer sequence | Optimal conditions | |
| --- | --- | --- | --- |
|  |  | **Annealing temperature (º C)** | **Primer final concentration (μM)** |
| *Bmal1* | F: AGA TGA ATT GGC TTC TTT GG | 60 | 1 |
| R: TGG CAC CTC TTA ATG TTT TC |
| *Clock* | F: ACT ACA AGA CGA AAA CGT AG | 60 | 0.5 |
| R: CAT CTC TGT CAA CAA TCG AG |
| *Per1* | F: ACA CTT CAG AAC CAG GAT AC | 60 | 0.5 |
| R: AGT GGA ACC ATA GAA GAC TC |
| *Per2* | F: GCC AAT GAA GAG TAT TAC CAG | 55.5 | 0.5 |
| R: ATT CTT CAC AAT GTG CTC AG |
| *Per3* | F: AAG TTT TGA AGT ATG CAG G | 60 | 0.5 |
| R: TCC AGT ATG ATG TAG TCT CC |
| *Cry1* | F: CCC AAT GGA GAC TAT ATC AGG | 60 | 0.5 |
| R: ACC TTT TGG ATA CCT TCT GG |
| *Cry2* | F: CTT TCT TCC AGC AGT TCT TC | 60 | 0.5 |
| R: CTC ATA GAT GTA TCG AGA GGG |
| *CSNK1ε* | F: CTC CGA ATT CTC AAC ATA CC | 60 | 0.5 |
| R: AAT TTC AGC ATG TCC CAG TC |
| *Rev-erbα* | F: CTC AAA GAA TGT TCT GCT GG | 58 | 1 |
| R: GTG AAG CTC ATG GAG AAA TC |
| *Rev-erbβ* | F: AGT GCC TGA AGA ATG AAA AC | 60 | 1 |
| R: GCA TCT CTT GAC ATT CCA AC |
| *Dec1* | F: CAA GTG TAC AAG TCA AGA CG | 58 | 0.5 |
|  | R: GTC TCT TTT TCT CGA TGA GC |  |  |
| *Gapdh* | F: GCC CAA TAC GAC CAA ATC C | 55.5 | 0.25 |
| R: ACA GTC AGC CGC ATC TTC |
| *Hprt* | F: GGC TTA TAT CCA ACA CTT CG | 55.5 | 0.25 |
| R: TGA CAC TGG CAA AAC AAT G |
| *β-2M* | F: CTC CAA AGA TTC AGG TTT ACT CAC | 55.5 | 0.25 |
| R: AGT CAA CTT CAA TGT CGG ATG G |

F: Forward sequence; R: Reverse sequence

Supplementary Table S2 Results of the harmonic regression analysis of each clock gene expression time course data obtained from each group of the study: controls, patients with insomnia and subgroups (ISSD and INSD).

| **Gene** | **Group** | **amplitude** | **acrophase** | **p-value** |
| --- | --- | --- | --- | --- |
| ***BMAL1*** | Control | 0.023658941514108 | 0.129693874767096 | 0.191 |
| Insomnia | 0.576860619821043 | -2.77344351824811 | 0.287 |
| ISSD | 0.578623192542425 | -2.70144607682823 | 0.313 |
| INSD | 0.636256673537299 | -2.8574804901907 | 0.255 |
| ***CLOCK*** | Control | 0.0475960107852363 | -0.403380624667903 | 0.054 |
| Insomnia | 0.269029800845554 | -1.90633533256691 | 0.469 |
| ISSD | 0.174133324144648 | -1.58865427902754 | 0.453 |
| INSD | 0.439744612291878 | -2.18674850487816 | 0.445 |
| ***PER1*** | Control | 0.780968405832803 | -0.12244428730078 | 0.078 |
| Insomnia | 0.766427001417302 | 0.283382933209785 | 0.255 |
| ISSD | 0.988606608833438 | 0.817007230839449 | 0.420 |
| INSD | 0.712428098268086 | -0.184627613980158 | 0.049 |
| ***PER2*** | Control | 0.345636233483048 | 0.00552150072287717 | 0.136 |
| Insomnia | 0.506694026182804 | 0.948653018286049 | 0.444 |
| ISSD | 0.57511672258319 | 0.976038888354844 | 0.448 |
| INSD | 0.482152631155021 | 0.92633273313922 | 0.441 |
| ***PER3*** | Control | 0.249923073113211 | -0.0601664283980115 | 0.107 |
| Insomnia | 0.400637182108744 | 0.0686102992653194 | 0.165 |
| ISSD | 0.305399838242982 | -0.617284989754864 | 0.151 |
| INSD | 0.651624710451131 | 0.598031478593232 | 0.364 |
| ***CRY1*** | Control | 0.0578576609047562 | 0.502582284805432 | 0.334 |
| Insomnia | 0.287327455397377 | -1.04918319591817 | 0.324 |
| ISSD | 0.31315166387033 | -0.653946232133727 | 0.168 |
| INSD | 0.307105647998846 | -1.42325154879039 | 0.426 |
| ***CRY2*** | Control | 0.341025859866893 | 0.366328775143457 | 0.286 |
| Insomnia | 0.320443545904113 | 0.242429292038514 | 0.238 |
| ISSD | 0.159527201300897 | -1.5915614046198 | 0.453 |
| INSD | 0.529128954532882 | 0.352941806154433 | 0.281 |
| ***REV-ERBα*** | Control | 0.425232358364001 | -1.23218592045928 | 0.380 |
| Insomnia | 0.175311790163952 | 0.848135201662974 | 0.426 |
| ISSD | 0.455264645060904 | 1.40646076616284 | 0.466 |
| INSD | 0.343539286252814 | 0.0574355757398532 | 0.160 |
| ***REV-ERBβ*** | Control | 0.311889897944208 | -0.576654061977929 | 0.133 |
| Insomnia | 0.310806574990597 | 0.535349122737535 | 0.345 |
| ISSD | 0.363584775781226 | 0.0913771777644758 | 0.174 |
| INSD | 0.306643033018381 | 0.982473498863903 | 0.449 |

Estimated amplitudes (formulated as A= √ (a2 + b2)) along with acrophase values and *p*-values (according to F-test) and are shown for a period of 24 hours.

Supplementary Table S3 Summary of accuracy, precision, recall and F1 score for the trained model across all permutations of the mean values of all time points for each clock gene in the insomnia and control groups, based on combinations of three genes.

| First_Gene | Second_Gene | Third_Gene | Accuracy | Precision | Recall |
| --- | --- | --- | --- | --- | --- |
| *Cry2* | ***Per1*** | ***Bmal1*** | **0.92** | **0.92** | **0.92** |
| *Cry2* | *Rev-erbb* | *Per1* | 0.92 | 1.00 | 0.83 |
| *Rev-erbb* | *Per1* | *Cry2* | 0.92 | 1.00 | 0.83 |
| *Bmal1* | *Per1* | *Cry2* | 0.92 | 0.86 | 1.00 |
| *Rev-erbb* | *Cry2* | *Per1* | 0.92 | 1.00 | 0.83 |
| *Per1* | *Rev-erba* | *Cry2* | 0.92 | 0.86 | 1.00 |
| *Bmal1* | *Cry2* | *Per1* | 0.92 | 0.86 | 1.00 |
| *Cry2* | *Rev-erba* | *Per1* | 0.92 | 0.86 | 1.00 |
| *Per1* | *Rev-erbb* | *Cry2* | 0.92 | 1.00 | 0.83 |
| *Cry2* | *Bmal1* | *Per1* | 0.92 | 0.92 | 0.92 |
| *Per1* | *Bmal1* | *Cry2* | 0.92 | 0.92 | 0.92 |
| *Rev-erba* | *Per1* | *Cry2* | 0.92 | 0.86 | 1.00 |
| *Bmal1* | *Per2* | *Rev-erba* | 0.92 | 0.92 | 0.92 |
| *Per1* | *Cry2* | *Bmal1* | 0.92 | 0.92 | 0.92 |
| *Bmal1* | *Rev-erba* | *Per2* | 0.92 | 0.92 | 0.92 |
| *Cry2* | *Per1* | *Rev-erbb* | 0.92 | 1.00 | 0.83 |
| *Rev-erba* | *Cry2* | *Per1* | 0.92 | 0.86 | 1.00 |
| *Per1* | *Cry2* | *Rev-erbb* | 0.92 | 1.00 | 0.83 |
| *Per1* | *Cry2* | *Rev-erba* | 0.92 | 0.86 | 1.00 |
| *Cry2* | *Per1* | *Rev-erba* | 0.92 | 0.86 | 1.00 |
| *Per3* | *Cry1* | *Cry2* | 0.92 | 0.92 | 0.92 |
| *Cry2* | *Cry1* | *Per3* | 0.92 | 0.92 | 0.92 |
| *Cry2* | *Rev-erba* | *Per3* | 0.92 | 0.92 | 0.92 |
| *Rev-erba* | *Per3* | *Cry2* | 0.92 | 0.92 | 0.92 |
| *Per3* | *Cry2* | *Cry1* | 0.92 | 0.92 | 0.92 |
| *Rev-erba* | *Per3* | *Per1* | 0.92 | 0.86 | 1.00 |
| *Per3* | *Rev-erba* | *Per1* | 0.92 | 0.86 | 1.00 |
| *Per3* | *Rev-erba* | *Cry2* | 0.92 | 0.92 | 0.92 |
| *Cry1* | *Cry2* | *Per3* | 0.92 | 0.92 | 0.92 |

Supplementary Table S4 Summary of accuracy, precision, recall and F1 score for the trained model across all permutations of the mean values of all time points for each clock gene in the ISSD and INSD insomnia subgroups, based on combinations of three genes.

| First_Gene | Second_Gene | Third_Gene | Accuracy | Precision | Recall |
| --- | --- | --- | --- | --- | --- |
| *Per2* | ***Bmal1*** | ***Clock*** | **0.92** | **0.86** | **1.00** |
| *Per2* | *Cry2* | *Per1* | 0.92 | 1.00 | 0.83 |
| *Cry2* | *Per1* | *Per3* | 0.92 | 1.00 | 0.83 |
| *Per1* | *Cry2* | *Rev-erbb* | 0.92 | 1.00 | 0.83 |
| *Cry2* | *Per2* | *Per1* | 0.92 | 1.00 | 0.83 |
| *Rev-erbb* | *Per1* | *Cry2* | 0.92 | 1.00 | 0.83 |
| *Cry2* | *Per1* | *Rev-erbb* | 0.92 | 1.00 | 0.83 |
| *Cry2* | *Per1* | *Rev-erba* | 0.92 | 1.00 | 0.83 |
| *Per1* | *Per2* | *Cry2* | 0.92 | 1.00 | 0.83 |
| *Cry2* | *Per1* | *Per2* | 0.92 | 1.00 | 0.83 |
| *Per1* | *Rev-erbb* | *Cry2* | 0.92 | 1.00 | 0.83 |
| *Cry2* | *Per1* | *Cry1* | 0.92 | 1.00 | 0.83 |
| *Per1* | *Per3* | *Cry2* | 0.92 | 1.00 | 0.83 |
| *Per2* | *Rev-erba* | *Clock* | 0.92 | 0.86 | 1.00 |
| *Per1* | *Rev-erba* | *Cry2* | 0.92 | 1.00 | 0.83 |
| *Cry2* | *Cry1* | *Per1* | 0.92 | 1.00 | 0.83 |
| *Bmal1* | *Per2* | *Clock* | 0.92 | 0.86 | 1.00 |
| *Per1* | *Cry2* | *Rev-erba* | 0.92 | 1.00 | 0.83 |
| *Per1* | *Cry2* | *Per3* | 0.92 | 1.00 | 0.83 |
| *Clock* | *Bmal1* | *Per2* | 0.92 | 0.86 | 1.00 |
| *Per1* | *Cry2* | *Per2* | 0.92 | 1.00 | 0.83 |
| *Rev-erbb* | *Cry2* | *Per1* | 0.92 | 1.00 | 0.83 |
| *Per1* | *Cry2* | *Cry1* | 0.92 | 1.00 | 0.83 |
| *Rev-erba* | *Clock* | *Per2* | 0.92 | 0.86 | 1.00 |
| *Per1* | *Cry1* | *Cry2* | 0.92 | 1.00 | 0.83 |
| *Cry2* | *Per3* | *Per1* | 0.92 | 1.00 | 0.83 |
| *Rev-erba* | *Cry2* | *Per1* | 0.92 | 1.00 | 0.83 |
| *Clock* | *Cry2* | *Per2* | 0.92 | 0.86 | 1.00 |
| *Per2* | *Per1* | *Cry2* | 0.92 | 1.00 | 0.83 |
| *Rev-erba* | *Per1* | *Cry2* | 0.92 | 1.00 | 0.83 |
